# Supplementary material
Source: publisher figshare collection journal article supplement (https://future-science-group.figshare.com/ndownloader/files/33020822)
Supplement: Supplementary file 1 [file 33020822]

## Sheet: Sheet1
Supplementary Table 5
Gene	Cancer Type	P-value
YTHDC1	BLCA	0.018202
YTHDC1	CESC	0.01581
YTHDC1	GBM	0.045244
YTHDC1	KIRC	0.001537
YTHDC1	LGG	0.020357
YTHDC1	PRAD	0.027577
YTHDC2	HNSC	0.014518
YTHDC2	LGG	0.020367
YTHDC2	LUAD	0.028388
YTHDC2	READ	0.000384
YTHDC2	SKCM	0.012302
YTHDC2	UCEC	0.025639
YTHDF1	LIHC	0.000629
YTHDF1	THCA	0.040504
YTHDF1	THYM	0.021452
YTHDF1	UVM	0.014701
YTHDF2	BLCA	0.016103
YTHDF2	KIRC	0.032428
YTHDF2	LGG	2.12e-05
YTHDF2	LIHC	0.019462
YTHDF2	LUAD	0.018805
YTHDF2	SARC	0.001393
YTHDF3	BRCA	0.033641
YTHDF3	COAD	0.008116
YTHDF3	KIRC	0.000416
YTHDF3	LAML	0.009718
YTHDF3	THCA	0.014161
YTHDF3	UVM	0.020816
IGF2BP1	ACC	0.001612
IGF2BP1	BRCA	0.018568
IGF2BP1	KIRC	0.008059
IGF2BP1	LGG	0.005789
IGF2BP1	LUAD	0.015411
IGF2BP1	MESO	0.000174
IGF2BP1	THCA	0.008936
IGF2BP1	UCEC	0.00041
IGF2BP1	UVM	0.033514
IGF2BP2	BLCA	0.031247
IGF2BP2	HNSC	0.011744
IGF2BP2	KIRC	0.002227
IGF2BP2	LAML	0.034543
IGF2BP2	LGG	7.26e-09
IGF2BP2	LUAD	0.029198
IGF2BP2	MESO	0.014417
IGF2BP2	PAAD	0.010968
IGF2BP2	UVM	9.29e-05
IGF2BP3	BLCA	0.028744
IGF2BP3	KIRC	4.28e-07
IGF2BP3	KIRP	8.69e-08
IGF2BP3	LAML	0.004834
IGF2BP3	LGG	4.15e-11
IGF2BP3	LIHC	0.033378
IGF2BP3	LUAD	0.01069
IGF2BP3	MESO	2.98e-05
IGF2BP3	PAAD	0.039937
IGF2BP3	SARC	0.017092
IGF2BP3	UCEC	0.015458
IGF2BP3	UVM	0.003705
HNRNPA2B1	ACC	0.000432
HNRNPA2B1	BLCA	0.030734
HNRNPA2B1	ESCA	0.048311
HNRNPA2B1	KICH	0.008847
HNRNPA2B1	KIRC	0.019515
HNRNPA2B1	LAML	0.048529
HNRNPA2B1	LGG	0.00094
HNRNPA2B1	LIHC	0.020039
HNRNPA2B1	LUAD	0.042859
HNRNPA2B1	OV	0.031032
HNRNPA2B1	SARC	0.002026
HNRNPA2B1	THYM	0.018603
HNRNPC	ACC	0.001546
HNRNPC	BRCA	0.003455
HNRNPC	CHOL	0.025854
HNRNPC	ESCA	0.025528
HNRNPC	GBM	0.049543
HNRNPC	KICH	0.048407
HNRNPC	KIRP	0.006227
HNRNPC	LUAD	0.001307
HNRNPC	PAAD	0.008426
HNRNPC	SARC	0.006211
HNRNPC	TGCT	0.035863
HNRNPC	THYM	0.037376
RBMX	ACC	0.021205
RBMX	CESC	0.042915
RBMX	ESCA	0.00468
RBMX	KIRC	0.032477
RBMX	READ	0.033963
METTL3	KIRC	0.024247
METTL3	LIHC	0.011
METTL3	MESO	0.003917
METTL3	PAAD	0.006378
METTL3	SKCM	0.025042
METTL14	ACC	0.029663
METTL14	KIRC	8.43e-06
METTL14	MESO	0.001983
METTL14	PRAD	0.001125
METTL14	READ	0.003373
WTAP	LUSC	0.043372
WTAP	OV	0.020056
WTAP	THYM	0.020756
RBM15	ACC	5.66e-05
RBM15	CHOL	0.042686
RBM15	KIRC	0.040524
RBM15	LGG	0.001918
RBM15	LIHC	0.009336
RBM15	READ	0.041467
RBM15	STAD	0.042107
RBM15	UCEC	0.046153
RBM15B	BRCA	0.006166
RBM15B	THYM	0.002655
RBM15B	UVM	1.1e-07
VIRMA	BRCA	0.03341
VIRMA	KICH	0.017004
VIRMA	KIRC	0.000426
VIRMA	KIRP	0.003472
VIRMA	PAAD	0.033098
VIRMA	SARC	0.045662
VIRMA	THYM	0.039839
VIRMA	UCEC	0.010035
VIRMA	UVM	0.04598
ZC3H13	CESC	0.010042
ZC3H13	KIRC	8.91e-06
FTO	BLCA	0.023528
FTO	KIRC	0.045413
FTO	LGG	0.045241
FTO	THCA	0.012896
ALKBH5	BLCA	0.046201
ALKBH5	ESCA	0.029831
ALKBH5	LAML	0.007619
ALKBH5	OV	0.036196
ALKBH5	PAAD	0.012252
